# Supplementary material for: Can running-related injuries be prevented through an online behavioural intervention in adult novice runners? Results of a randomised controlled trial
Source: HighWire-hosted journal article supplement (doi:10.1136/bmjsem-2022-001522), 2023-05-01
Supplement: bmjsem-2022-001522supp001_data_supplement.pdf [file bmjsem-2022-001522supp001_data_supplement.pdf]

## 1 Supplement 1 Additional information on the intervention Runfitcheck

2

3 The Runfitcheck was developed in 2016 according to an evidence- and practice-based approach to  
4 stimulate injury preventive behaviour amongst novice runners (1,2). Although the intervention has  
5 been described in detail in the aforementioned articles, after the first evaluation of the intervention,  
6 some adjustments were made based on the users' feedback.

7 The Runfitcheck starts with a few basic, newly developed, questions classifying the runner based on  
8 their running motivation, physical complaints and load-taking capacity. Based on these questions, the  
9 runner directly receives tailored advice consisting of: 1) their running profile, consisting of percentage  
10 match to a health-oriented, mental runner, social runner and goal-oriented runner; 2) information about  
11 their injury risk; and 3) advice on their running profile in combination with the injury risk and the pitfalls.  
12 Next, the runner is directed to a personal dashboard for achieving optimal running practice. This  
13 dashboard consists of a training schedule, a warming-up routine through an instruction video and  
14 instruction videos of strength exercises. The training schedules were adapted to their running goal. A  
15 new addition to the dashboard is information on how to listen to your body's signals in terms of pain  
16 signals, fatigue, recovery and resting heart rate. This information was developed in consultation with  
17 running experts.

18

## 19 References

20

- 21 1. Kemler E, Cornelissen MH, Gouttebarghe V. Is it possible to stimulate injury-preventive  
22 behaviour in adult novice runners with an online intervention? Results of a randomized  
23 controlled trial. *South African Journal of Sports Medicine*. 2020;submitted.
- 24 2. Kemler E, Gouttebarghe V. A Tailored Advice Tool to Prevent Injuries Among Novice Runners:  
25 Protocol for a Randomized Controlled Trial. *JMIR Res Protoc*. 2018;7(12):1.

26

27

28
