# Supplementary material for: Can running-related injuries be prevented through an online behavioural intervention in adult novice runners? Results of a randomised controlled trial
Source: HighWire-hosted journal article supplement (doi:10.1136/bmjsem-2022-001522), 2023-05-01
Supplement: bmjsem-2022-001522supp004_data_supplement.pdf [file bmjsem-2022-001522supp004_data_supplement.pdf]

## Supplement 4 Additional questions Runfitcheck (T5 & T9)

### RFC group (active and inactive approach)

All questions are single response unless otherwise stated in question

[RFCbekeken]

Have you viewed or used the Runfitcheck website ([www.runfitcheck2.nl](http://www.runfitcheck2.nl)) in the past 4 months?

Yes - on to question 2

No – on to question 5

[RFCWatViews]

What parts of the website have you viewed or used? (multiple answers possible)

- Landing page
- Test for type of runner
- Warm-up exercises with videos
- Muscle strengthening exercises
- Knowledge test(s)
- Training Schedule
- Tips
- Other, namely

[RFCHoevaak]

How many times have you viewed or used the website?

- 1 time in total
- 1 time per month
- 1 time every 2 weeks
- 1 time per week
- Several times a week
- Otherwise....

[RFCDashboard]

Did you create a personal dashboard as a result of the determination test at the beginning?

Yes – to end (or monitor where to build in T2)

No – on to question 6

[RFCNee]

Why didn't you view/use the Runfitcheck? (multiple answers possible)

- I'm using another running app/tool
- The website didn't sound interesting
- I didn't see the point of the website
- The first look at the website did not attract me
- No time
- Otherwise.....

[RFCDashNo]

Why didn't you create a personal dashboard?

- I thought it was too much hassle
- I didn't see the point of it
- Otherwise.....

### Control group

All questions: single response – unless otherwise stated

[RFC known]

Have you ever heard of the Runfitcheck?

- Yes -> on to question 2
- No -> on to next part of the question... monitor oid

[RFCknownHow to]

How did you hear about the Runfitcheck?

- Google
- Sociale Media
- Friends / family / known person
- Sporting event
- Otherwise....

[RFCbekeken]

Have you used or viewed the Runfitcheck?

- Yes -> on to question 4
- No

[RFCWatViews]

Multiple response

What have you viewed or used from the Runfitcheck? (multiple answers possible)

- Landing page
- Test for type of runner
- Warm-up exercises with videosMuscle strengthening exercises
- Knowledge test(s)
- Training ScheduleTips
- Otherwise...

[ RFCHoevaak]

How many times have you viewed or used the website?

- 1 time in total
- 1 time per month
- 1 time every 2 weeks
- 1 time per week

Several times a week  
Otherwise....
